# Supplementary material for: Facile and template-free synthesis of porous carbon modified with FeOx for transfer hydrogenation of nitroarenes
Source: Royal Society of Chemistry journal article supplement (doi:10.1039/d2nj00064d), 2022-01-01
Supplement: d2nj00064d1.pdf [file d2nj00064d1.pdf]

## Supporting Information

Facile and template-free synthesis of porous carbon modified with FeO<sub>x</sub> for transfer hydrogenation of nitroarenes

*Kunyu Wang<sup>a</sup>, Zhipeng Zong<sup>a</sup>, Yao Yan<sup>b</sup>, Zhijun Xia<sup>a</sup>, Dehua Wang\* and Shuchang Wu<sup>\*a,b</sup>*

- a. School of Pharmaceutical and Materials Engineering, Taizhou University, Taizhou 318000, Zhejiang, China.
- b. Fujian Key Laboratory of Electrochemical Energy Storage Materials, Fuzhou University, 2 Xueyuan Road, Fuzhou, 350116, China.

**Materials.** Nitrobenzene (99%), hydrazine hydrate (85%) and ethanol were supplied by China Medicine Group Shanghai Chemical Reagent Company. Nitrotoluene (99%), 4-ethylnitrobenzene (99%), 4-nitroanisole (98%), 4-nitroaniline (99%), m-dinitrobenzene (99%), 4-nitrophenol (99%), 2-nitrophenol (99%), 2-nitrobenzyl alcohol (98%), 4-nitrochlorobenzene (99.5%), 4-nitroiodobenzene (98%), 1-Bromo-4-nitrobenzene (99%), 2-nitrofluorene (98%), 8-nitroquinoline (98%), 5-nitroindole (98%) and sodium citrate dihydrate (99%) were purchased from Aladdin Reagent Co. Ltd., Shanghai, China. Ferric citrate pentahydrate (99%) was bought from Xiya Reagent Research Center. All the chemicals were used without further purification.

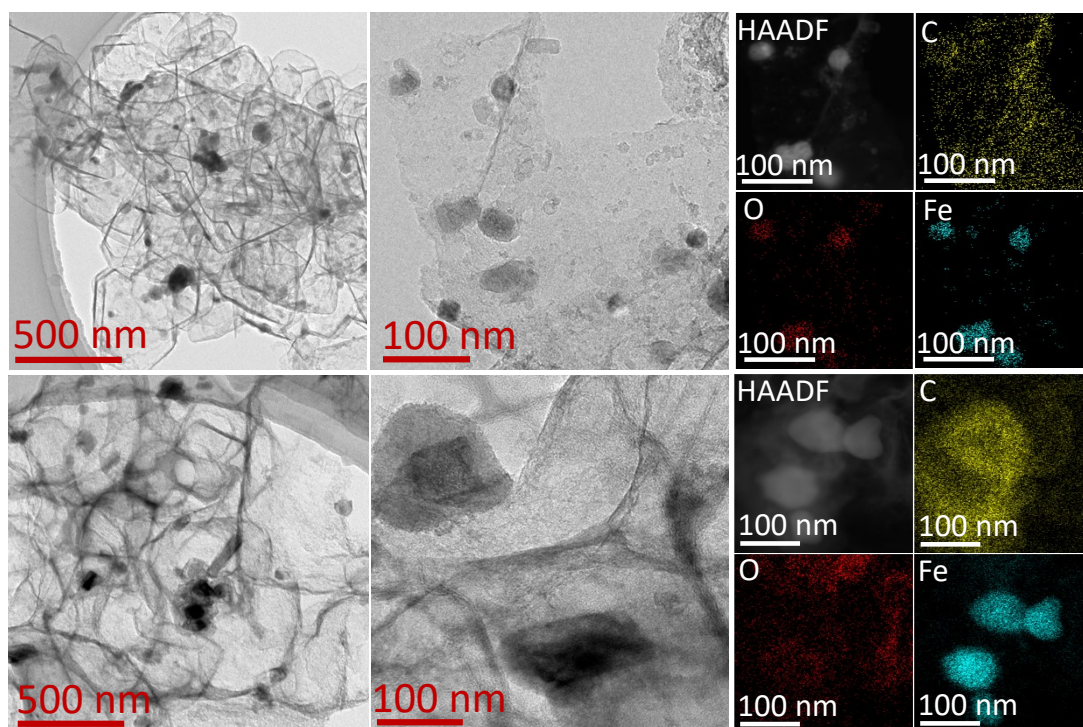

Fig. S1 TEM and HAADF image combined with elemental mapping of FeC600 (top) and FeC800 (bottom)

Table S1. The specific surface area, pore volume and diameter of each catalyst

| Sample | $S_{\text{BET}}$ (m <sup>2</sup> /g) | $S_{\text{micro}}$ (m <sup>2</sup> /g) | $V_{\text{total}}$ (cm <sup>3</sup> /g) | $V_{\text{micro}}$ (cm <sup>3</sup> /g) |
|--------|--------------------------------------|----------------------------------------|-----------------------------------------|-----------------------------------------|
| FeC600 | 256.1±5.3                            | 117.4                                  | 0.1172                                  | 0.0606                                  |
| FeC700 | 364.1±8.5                            | 185.0                                  | 0.1725                                  | 0.0991                                  |
| FeC800 | 261.1±2.4                            | 25.2                                   | 0.1083                                  | 0.0122                                  |

Table S2. The surface of content of each element detected by XPS

| Sample | C (at%) | O (at%) | Fe (at%) |
|--------|---------|---------|----------|
| FeC600 | 91.42   | 7.20    | 1.37     |
| FeC700 | 88.84   | 9.28    | 1.87     |
| FeC800 | 88.86   | 9.88    | 1.26     |

Table S3 The performance of different materials for the transfer hydrogenation of

## nitrobenzene

| Catalyst                                                              | Catalyst loading (mg) | Substrate dosage (mmol) | Hydrazine dosage (mmol) | Temperature (oC) | Time  | Yield (%) | Ref.      |
|-----------------------------------------------------------------------|-----------------------|-------------------------|-------------------------|------------------|-------|-----------|-----------|
| Rh/Fe <sub>3</sub> O <sub>4</sub> /g-C <sub>3</sub> N <sub>4</sub> -N | 13                    | 1                       | 3                       | 110              | 6min  | >99       | [1]       |
| SBA-15@Pr-NH <sub>2</sub> /MF-Pd(0)                                   | 3.8                   | 1                       | 3                       | 80               | 30min | 97        | [2]       |
| MoS <sub>2</sub> @C                                                   | 10                    | 10                      | 40                      | 80               | 1h    | 99        | [3]       |
| CeO <sub>2</sub>                                                      | 30                    | 2                       | 12                      | 80               | 8h    | 93        | [4]       |
| MoOxNy-550 (2 : 1)                                                    | 20                    | 0.5                     | 0.75                    | 30               | 50min | >99       | [5]       |
| Co@NC                                                                 | 10                    | 1                       | 400μL                   | 80               | 30min | 97        | [6]       |
| FeSA@NC-20A                                                           | 10                    | 1                       | 3                       | rt               | 30min | 99        | [7]       |
| Fe/Fe <sub>3</sub> C@NC750                                            | 20                    | 1                       | 4                       | 60               | 1h    | 100       | [8]       |
| Fe-phenanthroline/C                                                   | 1 mol% Fe             | 0.5                     | 2                       | 100              | 15h   | 99        | [9]       |
| Fe <sub>3</sub> O <sub>4</sub> /Pectin/Au                             | 0.2 mol%              | 1                       | 3                       | 90               | 1h    | 98        | [10]      |
| ImmFe-IL                                                              | 3 mol%                | 1                       | 3                       | 110              | 12h   | 98        | [11]      |
| Ni-WC                                                                 | 10                    | 0.5                     | 400μL                   | 60               | 30min | 99        | [12]      |
| Rh                                                                    | 1 mol%                | 0.5                     | 1                       | 80               | 2.5h  | 99        | [13]      |
| Fe-500-1h                                                             | 0.025mmol             | 1                       | 4                       | 85               | 1h    | 100       | [14]      |
| FeC700                                                                | 5                     | 3                       | 4 equiva.               | 100              | 1h    | 83        | This work |

Table S4. The reduction of nitroarenes with different substituents over FeC700

| Entry             | Substrate                                                                           | Product                                                                             | Conv. (%) | Sel. (%) |
|-------------------|-------------------------------------------------------------------------------------|-------------------------------------------------------------------------------------|-----------|----------|
| 1 <sup>[a]</sup>  | 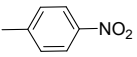   |    | 99        | 99       |
| 2 <sup>[a]</sup>  |    |    | 99        | 99       |
| 3 <sup>[a]</sup>  |    |    | 69.3      | 99       |
| 4 <sup>[b]</sup>  |    |    | 94.9      | 99       |
| 5 <sup>[a]</sup>  |    |    | 62.1      | 95.9     |
| 6 <sup>[b]</sup>  |    |    | 99        | 96.5     |
| 7 <sup>[c]</sup>  |    |    | 99        | 99       |
| 8 <sup>[a]</sup>  |    |    | 99        | 99       |
| 9 <sup>[b]</sup>  |    |    | 99        | 98.8     |
| 10 <sup>[b]</sup> |  |  | 99        | 98.6     |
| 11 <sup>[d]</sup> |  |  | 99        | 99       |
| 12 <sup>[d]</sup> |  |  | 99        | 91.8     |
| 13 <sup>[e]</sup> |  |  | 95.7      | 93.8     |
| 14 <sup>[f]</sup> |  |  | 99        | 99       |
| 15 <sup>[f]</sup> |  |  | 88.5      | 98.4     |
| 16 <sup>[g]</sup> |  |  | 99        | 95.9     |
| 17 <sup>[g]</sup> |  |  | 99        | 99       |

[a] 3mg FeC700, 1mmol substrate, 6mmol hydrazine hydrate (85%), 1mL ethanol, 100°C, 3h.

[b] 3mg FeC700, 1mmol substrate, 6mmol hydrazine hydrate (85%), 1mL ethanol,

110°C, 3h.

[c] 3mg FeC700, 1mmol substrate, 12mmol hydrazine hydrate (85%), 1mL ethanol, 100°C, 3h.

[d] 3mg FeC700, 1mmol substrate, 6mmol hydrazine hydrate (85%), 1mL ethanol, 90°C, 3h.

[e] 3mg FeC700, 1mmol substrate, 6mmol hydrazine hydrate (85%), 1mL ethanol, 80°C, 3h.

[f] 3mg FeC700, 0.5mmol substrate, 3mmol hydrazine hydrate (85%), 1mL ethanol, 100°C, 3h.

[g] 3mg FeC700, 0.5mmol substrate, 3mmol hydrazine hydrate (85%), 1mL ethanol, 110°C, 3h.

## Reference

[1] Z. Hu, J. Zhou, Y. Ai, L. Liu, L. Qi, R. Jiang, H. Bao, J. Wang, J. Hu, H.B. Sun, Q. Liang, *Journal of Catalysis*, 2018, 368, 20–30.

[2] A. Nuri, Y. Mansoori, F. Ghahramani, D. Esquivel, M. A. Navarro, *Applied Physics A*, 2022, 128,157

[3] J. Wang, Y. Zhang, J. Diao, J. Zhang, H. Liu, D. Su, *Chinese Journal of Catalysis*, 2018, 39, 79–87.

[4] N. Anbu, C. Vijayan, A. Dhakshinamoorthy, *ChemistrySelect*, 2019, 4, 1379-1386.

[5] S. Luo, Y. Long, K. Liang, J. Qin, Y. Qiao, J. Li, G. Yang, J. Ma, *Green Chem.*, 2021, 23, 8545–8553.

[6] S. Chen, L.L. Ling, S.F. Jiang, H. Jiang, *Green Chem.*, 2020, 22, 5730–5741.

[7] G. Lu, K. Sun, Y. Lin, Q. Du, J. Zhang, K. Wang, P. Wang, *Nano Research*, 2022, 15, 603–611

[8] B. Feng, Q. Xu, X. Wu, C. Ye, Y. Fu, D.L. Chen, F. Zhang, W. Zhu, *Applied Surface Science*, 2021, 557, 149837

[9] R.V. Jagadeesh, G. Wienhöfer, F.A. Westerhaus, A.E. Surkus, M.M. Pohl, H. Junge, K. Junge, M. Beller, *Chem. Commun.*, 2011, 47, 10972–10974

[10] Y. Li, N. Li, W. Jiang, G. Ma, M.M. Zangeneh, *International Journal of Biological Macromolecules*, 2020, 163, 2162–2171.

- [11] N.M. Patil, T. Sasaki, B.M. Bhanage, *ACS Sustainable Chem. Eng.* 2016, 4, 429–436.
- [12] Y. Ma, Z. Lang, J. Du, L. Yan, Y. Wang, H. Tan, S.U. Khan, Y. Liu, Z. Kang, Y. Li, *Journal of Catalysis*, 2019, 377, 174–182
- [13] M. Shokouhimehr, J.E. Lee, S.I. Han, T. Hyeon, *Chem. Commun.*, 2013, 49, 4779-4781.
- [14] Y. Li, Y.X. Zhou, X. Ma, H.L. Jiang, *Chem. Commun.*, 2016, 52, 4199-4202.
